# Supplementary material
Source: PubMed Central journal article supplement (PMC1415324)
Supplement: mbc_E05-07-0668_1.pdf [file mbc_E05-07-0668_1.pdf]

NBP1 1 MLKSVQGLWKDFFGIRD DGRKREYGSLEDEVRRK-----RSALRSRR  
Candida 1 MFETIKDLFAGVVTSDRRKKEHGSLADIKRRSMNKRKRALGHNKSITNTDORNAEYLNK  
Kluyveromyces 1 -MENLKQYWNWSWYENDGRKSDKYPLKTRYRG-----TKTSDRYK  
Ashbya 1 MLEPLKNIIVSDFWLKTDTRKRE-YGSLEDEWKO-----QRGQERIGR  
YPR174c 1 -----

NBP1 41 KOMRPTGKS-VLKRPRKVTDKRTEEKIRTNRRKTPKRRLTKIFQTI RDVFSNDNENMSKM  
Candida 61 LKM RNSIRG-KVGKPLRGGYMNSVDIKPDTKESR---ARMVLNAVKSIFSNEDQTLMM  
Kluyveromyces 41 VQKPNTRASRLRREPEVSEYRKPNPAEN-GS-----QPSTWSKIKSLFDSNRDITEL  
Ashbya 41 PRRRASTRY-KVTKE SAVHQ SALPLPVERPGAAAVRRNERTWWDRLCGVFSAEQORDLHGM  
YPR174c 1 -----MGIQEKTLLGIRKE

NBP1 100 QNVC GDMTRILKKRSQGRPSYMDTDTAKSRILRSDAFKRKISELKYNKQRISSELRSGS--  
Candida 117 ASTDINKL L RNOGYDKNQE-----NLKDSILRSNAFKKKVTELEYNKRMLRDLRRSG--  
Kluyveromyces 94 KQAYLDYRLPNTEPSNTQ-----ADIDRLVVNERFKKKLLEKRYERNMLNELRRGRQP  
Ashbya 100 RDAFANYR L PPTTEELEGR---RRGTASQRIARSETFKKRVLKMYDDRMLEQLRAGS--  
YPR174c 14 RKL VVPRER N HVRHASQR-----TRSKNYKNISKKRAQQHAFGFNIAKTLAKIQ--

NBP1 158 ---SDGSSGKDRNQS L YLDREI LLQROIKKRDEKIKALESKLOSLOEALNYSNEKYRILE  
Candida 169 ---VSGNYNIIRDDDLEEDRYL LLQKKYQIKKRLYEVEQELKSVQDSLRYSOEMNALLQ  
Kluyveromyces 147 YRRNREHRPSVNSPINHADEVILLRKKLDELEQR L SDAVEELVITKKKLEFVQOKNNLLE  
Ashbya 155 -RGRRPERPAL--PGSDADQV V LLQNR LH KLERQLFETQKELELAKKKLMPAHEKTKLFE  
YPR174c 64 -AFVWGS PADEEEES VVPLSKNSQDCVPLQWQAKFAQLRQQLHSTQKELOQFVKEKCHLLO

NBP1 215 DILDSSNIHPSYTKSRR TMSNLARENDEIKPLKIDLSPSPIR--RTNSLFTSSPMKTYN-  
Candida 226 ETL D KANID DAY L KSRROIKNLQKE--NVLPERELSPSPRR--PIDPLFTSSPVKSRN  
Kluyveromyces 207 ELFD DGKMETEYVKSRRNITNLONS--ERKPELKQLPRSPSPVLHVDPMFTSSPIRATNN  
Ashbya 212 SLDDANVDDDYVKSRRRITNL RATT-DNQPALRSLSPSPORPYPVNPLFTSSPIRQVN-  
YPR174c 123 SVLDDANIDORYLESRRDMKNIERD--NLKPTENLPPSPVR--AVNPLVTSSPIHMSPL

NBP1 272 --RDGNIP-----EMOPLQENISPACPTPPYRSRETEKED-----ETLS  
Candida 281 GEENGSKPKTDYKHSPIKETS NFYDKYKLPETEQLAQDKG-----N-HSLS  
Kluyveromyces 265 ILGEGSPQ-----HVQOHDNFYEKYPRIKTERLDNYRSSLANHEDDYQDRHAENSLS  
Ashbya 270 ---DSPRK-----QINKPDDFYAKYPTIPKTELLNKOPS-----ENAAAGR-AKESLS  
YPR174c 178 QSRQRPVSS-----LQPPKGNF YAKYKLPQTNILRESPT-----EDSV

NBP1 309 PISVDFSSYLS----  
Candida 327 PIRIDYSRYSS----  
Kluyveromyces 318 PVRVDYSKYSSGV--  
Ashbya 314 PVRIDYSKYSSPRRK  
YPR174c 218 PHAE-----
